# Supplementary material for: Late-Relapsing Hepatitis after Yellow Fever
Source: MDPI journal article supplement (doi:10.3390/v12020222), 2020-02-17
Supplement: s1 [file s1]

**Supplementary Figure S1. Serum levels of anti-YFV IgG.** IgG antibodies anti-YFV were investigated by in house ELISA, using different serum samples collected at the 8th, 36th, 78th, 83rd, 197th, and 306th day post-symptoms onset (DPS). The antibody titers were calculated using the software SoftMax Pro® by regression logistic for four parameters and expressed in IU/mL relative to the reference antiserum, as described in supplementary methods.
