# Supplementary material for: Late-Relapsing Hepatitis after Yellow Fever
Source: MDPI journal article supplement (doi:10.3390/v12020222), 2020-02-17
Supplement: s1 [file s1]

**Table S1:** Hemoglobin and blood cells counts during acute yellow fever and late relapsing hepatitis after yellow fever

| Timeline<br>Month/DPS |     | Laboratory tests (normal range values /unit) <sup>#</sup> |                                |                           |                                      |                                      |                           |
|-----------------------|-----|-----------------------------------------------------------|--------------------------------|---------------------------|--------------------------------------|--------------------------------------|---------------------------|
|                       |     | Platelets<br>(150,000-<br>450,000mm³)                     | Hemoglobin<br>(14-18<br>g/dL*) | Hematocrit<br>(42 - 50%*) | Leukocyte<br>(4,000 -<br>11,000 mm³) | Neutrophil<br>(2,000 - 8,250<br>mm³) | Lymphocyte<br>(30% - 45%) |
| Jan                   | 4   | 73,000                                                    | 17                             | 50                        | 4250                                 | 2,550                                | 34.0                      |
|                       | 7   | 88,000                                                    | 13.7                           | 41.8                      | 2,900                                | 1,711                                | 21.0                      |
|                       | 8   | 136,000                                                   | 13.1                           | 40.2                      | 4,800                                | 2,688                                | 28.0                      |
|                       | 9   | 142,000                                                   | 12.6                           | na                        | 4,700                                | na                                   | na                        |
|                       | 10  | 143,000                                                   | 12.3                           | 38.1                      | 4,600                                | 2,944                                | 31.3                      |
|                       | 11  | 152,000                                                   | 11.8                           | 36.7                      | 4,400                                | 2,860                                | 27.0                      |
|                       | 12  | 174,000                                                   | 11.8                           | 36.5                      | 5,500                                | 3,850                                | 24.0                      |
|                       | 14  | 178,000                                                   | 12.5                           | 39.6                      | 6,300                                | 4,473                                | 21.0                      |
| Feb                   | 36  | 158,000                                                   | 11.6                           | 34.8                      | 4,700                                | 2820                                 | 29.0                      |
| Mar                   | 64  | 171,000                                                   | 14.2                           | na                        | na                                   | na                                   | na                        |
|                       | 70  | 189,000                                                   | 14.8                           | na                        | na                                   | na                                   | na                        |
|                       | 78  | 189,000                                                   | 13.4                           | 39.3                      | 4,900                                | 3,479                                | 25.0                      |
|                       | 82  | 144,000                                                   | 12.9                           | 38.5                      | 5,100                                | 2,805                                | 35.0                      |
| Apr                   | 89  | 153,000                                                   | 14                             | 41.1                      | 7,400                                | 5,180                                | 20.0                      |
|                       | 92  | 131,000                                                   | 12.2                           | 35.1                      | 3,400                                | 1,938                                | 31.0                      |
|                       | 93  | 105,000                                                   | 13.5                           | 38.8                      | 3,700                                | 2,183                                | 32.0                      |
|                       | 95  | 164,000                                                   | 13.2                           | 38.6                      | 4,900                                | 2,989                                | 30.0                      |
| May                   | 124 | 185,000                                                   | 13.3                           | 37.9                      | 7,000                                | 4,690                                | 26.0                      |
| Jul                   | 186 | 150,000                                                   | 16.5                           | 46.8                      | 7,280                                | na                                   | 28.8                      |
|                       | 197 | 159,000                                                   | 17.7                           | 52.3                      | 7,600                                | 5,092                                | 26.0                      |
| Nov                   | 306 | 145,000                                                   | 17.4                           | 49.9                      | 7,000                                | 4,760                                | 25.0                      |

DPS: day post symptom onset of yellow fever. na: not available. The days when the patient was hospitalized are shown in blue, the periods when the patient had elevated levels of aspartate transaminase (AST) and alanine transaminase (ALT) are shown in green, and periods when the patient had jaundice are shown in orange. <sup>#</sup>normal range values are presented according to American Board of Internal Medicine Laboratory Test Reference Ranges–January 2020[11]. Normal range are presented in International System Units (SI), calculated by the multiplication of values in conventional units per conversion factor (CF), as follows: platelet: 150,000-450,000 mm<sup>3</sup> × 0.001 (CF) = 150-450 × 10<sup>9</sup>/L, hematocrit: 41-53% × 0.01 (CF) = 0.41-0.53 fraction, leukocyte: 3,500 - 10,000 mm<sup>3</sup> × 0.001 (CF) = 3.5 -10 × 10<sup>9</sup> cell/L, and neutrophil: 1,600 – 8,000 mm<sup>3</sup> × 1.0 (CF) = 1,600 – 8,000 cell/μL.
